# Supplementary material
Source: PubMed Central journal article supplement (PMC4696583)
Supplement: ASN.2015010062_ASN2015010062SupplementaryData.pdf [file ASN.2015010062_ASN2015010062SupplementaryData.pdf]

## **SUPPLEMENTAL MATERIAL**

### **Proteinuria as Non-Invasive Marker for Renal Allograft Histology and Failure: an Observational Cohort Study**

Maarten Naesens, MD PhD; Evelyne Lerut, MD PhD; Marie-Paule Emonds, MD PhD; Albert Herelixka; Pieter Evenepoel, MD PhD; Kathleen Claes, MD PhD;  
Bert Bammens, MD PhD; Ben Sprangers, MD PhD; Björn Meijers, MD PhD; Ina Jochmans, MD PhD; Diethard Monbaliu, MD PhD; Jacques Pirenne, MD PhD;  
Dirk RJ Kuypers, MD PhD

#### **Corresponding author:**

Prof. Dr. Maarten Naesens; Nephrology and Renal Transplantation; University Hospitals Leuven; Herestraat 49; 3000 Leuven. Belgium (EU);  
Tel. +32 16 344580; Fax +32 16 344599; Email: maarten.naesens@uzleuven.be

## **SUPPLEMENTAL MATERIAL**

**Supplemental Figure 1.** Overview of the patients and biopsies included. In Cohort 1, renal allograft biopsies were performed for clinical indication only. In Cohort 2, biopsies were performed at pre-specified time points after transplantation (protocol-specified biopsies at 3, 12, and 24 months after transplantation) and for clinical indication. Proteinuria measurements in 24h urine collections were performed at time of a protocol-specified biopsy, or within one week around an indication biopsy.

**Supplemental Figure 2.** Kaplan Meier survival curves for graft survival according to degree of proteinuria in Cohort 2 at 3 months, 1 and 2 years after Transplantation, and at time of an indication biopsy.

**Supplemental Table 1.** Hazard Ratio (multivariate models) for Graft Failure According to Renal Function and Proteinuria at 1, 2 and 5 Years after Transplantation in Cohort 1.

**Supplemental Table 2.** Hazard ratio (univariate models) for post-biopsy graft failure, according to individual clinical and histological parameters in Cox proportional hazards analysis in Cohort 1 and 2.

**Supplemental Table 3.** Hazard ratio (multivariate models) for graft failure according to renal allograft histology, renal function and proteinuria at time of biopsy, adjusted for donor age and time after transplantation in Cox proportional hazards analysis (Cohort 2; N=919 biopsies).

**Supplemental Table 4.** Univariate analysis of the determinants of 24h proteinuria in Cohort 1 (N=1335 indication biopsies) and in Cohort 2 (N= 919 indication and protocol biopsies).

**Supplemental Table 5.** Association between proteinuria and concomitant renal graft histology after transplantation according to time after transplantation in Cohort 1 (N=1335 indication biopsies).

**Supplemental Figure 1. Overview of the patients and biopsies included.**

In Cohort 1, renal allograft biopsies were performed for clinical indication only. In Cohort 2, biopsies were performed at pre-specified time points after transplantation (protocol-specified biopsies at 3, 12, and 24 months after transplantation) and for clinical indication. Proteinuria measurements in 24h urine collections were performed at time of a protocol-specified biopsy, or within one week around an indication biopsy. In Cohort 1, renal allograft biopsies were performed for clinical indication only. In Cohort 2, biopsies were performed at pre-specified time points after transplantation (protocol-specified biopsies at 3, 12, and 24 months after transplantation) and for clinical indication. Proteinuria measurements in 24h urine collections were performed at time of a protocol-specified biopsy, or within one week around an indication biopsy.

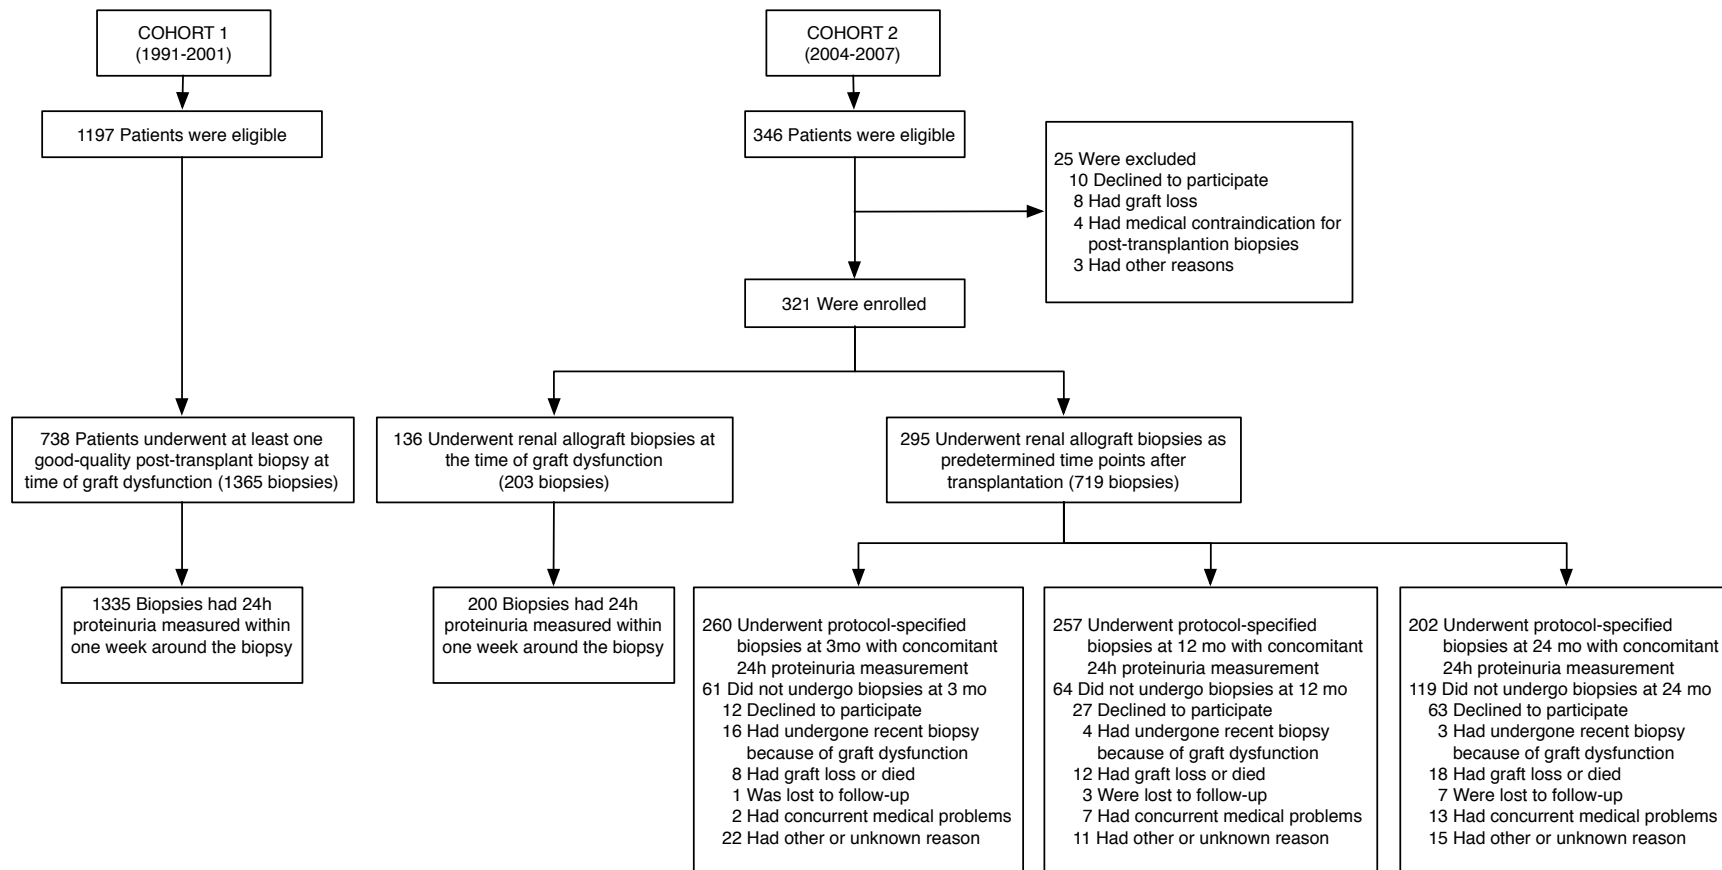

Supplemental Figure 2. Kaplan Meier Graft Survival Curves according to Degree of Proteinuria in Cohort 2.

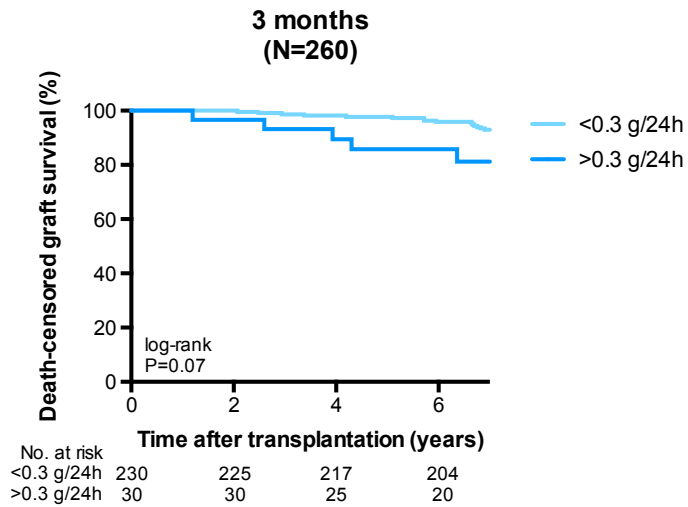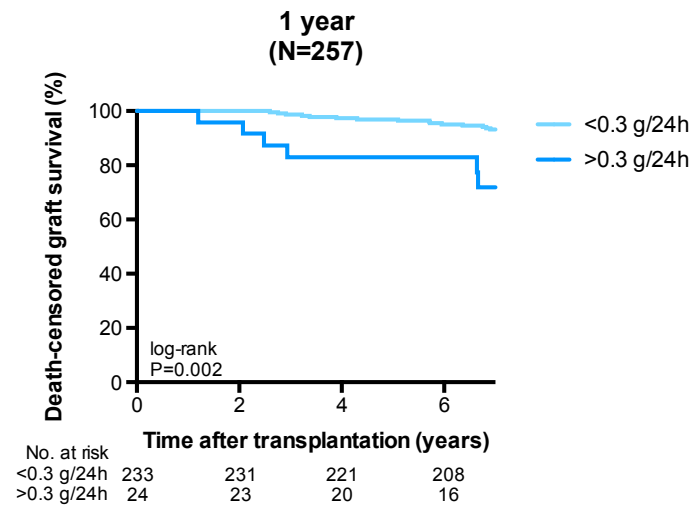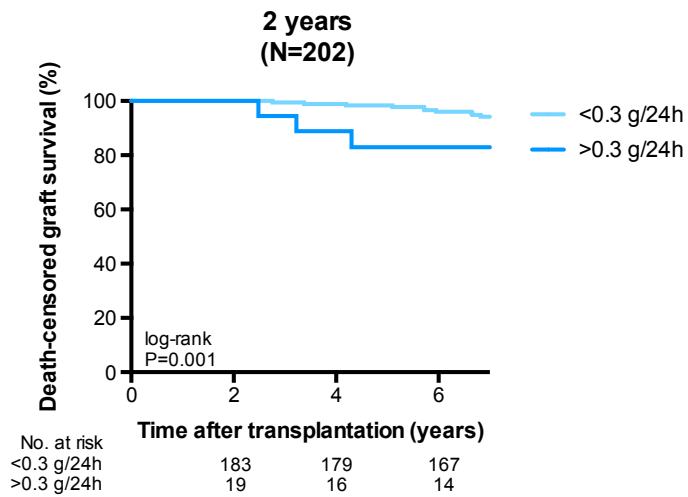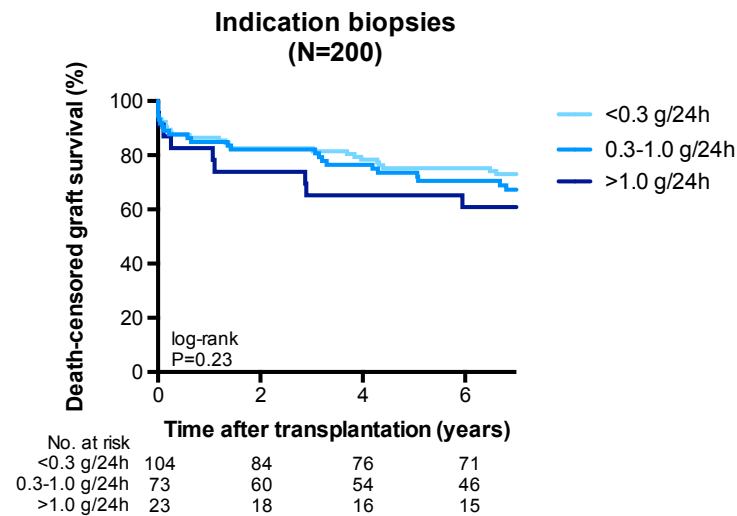

**Supplemental Table 1. Hazard Ratio (multivariate models) for Graft Failure According to Renal Function and Proteinuria at 1, 2 and 5 Years after Transplantation in Cohort 1.**

|                                     | 1 year<br>after transplantation |         | 2 years<br>after transplantation |         | 5 years<br>after transplantation |         |
|-------------------------------------|---------------------------------|---------|----------------------------------|---------|----------------------------------|---------|
|                                     | Adjusted Hazard Ratio (95% CI)  | P value | Adjusted Hazard Ratio (95% CI)   | P value | Adjusted Hazard Ratio (95% CI)   | P value |
| <b>COHORT 1<sup>a</sup></b>         | N=778                           |         | N=731                            |         | N=637                            |         |
| <u>Proteinuria</u>                  |                                 |         |                                  |         |                                  |         |
| 0.3-1.0 vs. <0.3 g/24h              | 1.96 (1.33-2.89)                | <0.001  | 1.70 (1.12-2.58)                 | 0.01    | 2.42 (1.56-15.7)                 | <0.001  |
| 1.0-3.0 vs. <0.3 g/24h              | 2.90 (1.62-5.18)                | <0.001  | 3.91 (2.20-6.94)                 | <0.001  | 4.19 (2.27-7.75)                 | <0.001  |
| >3.0 vs. <0.3 g/24h                 | 8.48 (2.85-25.2)                | <0.001  | 6.52 (1.96-21.7)                 | 0.002   | 8.94 (2.51-31.9)                 | <0.001  |
| <u>Estimated GFR</u>                |                                 |         |                                  |         |                                  |         |
| 30-45 vs. >45 mL/min/m <sup>2</sup> | 1.91 (1.28-2.84)                | 0.001   | 2.30 (1.50-3.54)                 | <0.001  | 2.41 (1.40-4.14)                 | 0.002   |
| 15-30 vs. >45 mL/min/m <sup>2</sup> | 3.86 (1.41-6.18)                | <0.001  | 4.52 (2.73-7.49)                 | <0.001  | 11.7 (6.76-20.1)                 | <0.001  |
| <15 vs. >45 mL/min/m <sup>2</sup>   | 17.5 (8.33-36.9)                | <0.001  | 44.7 (19.7-102)                  | <0.001  | 79.6 (31.8-87.4)                 | <0.001  |
| <b>COHORT 2</b>                     | N=257                           |         | N=202                            |         | --                               |         |
| <u>Proteinuria</u>                  |                                 |         |                                  |         |                                  |         |
| 0.3-1.0 vs. <0.3 g/24h              | 2.71 (0.79-9.28)                | 0.11    | 3.03 (0.83-11.1)                 | 0.09    | --                               | --      |
| >1.0 vs. <0.3 g/24h                 | 13.5 (3.84-16.4)                | <0.001  | 5.55 (1.11-27.8)                 | 0.04    | --                               | --      |
| <u>Estimated GFR</u>                |                                 |         |                                  |         |                                  |         |
| 30-45 vs. >45 mL/min/m <sup>2</sup> | 2.18 (0.96-4.49)                | 0.06    | 21.6 (0.71-6.63)                 | 0.18    | --                               | --      |
| <30 vs. >45 mL/min/m <sup>2</sup>   | 14.4 (4.59-45.3)                | <0.001  | 15.5 (4.79-50.2)                 | <0.001  | --                               | --      |

<sup>a</sup>The data are based on multivariate Cox proportional-hazards models adjusted for donor and recipient age and gender, baseline immunosuppression, repeat transplantation, delayed graft function and T-cell mediated rejection in the first year after transplantation.

**Supplemental Table 2. Hazard ratio (univariate models) for post-biopsy graft failure, according to individual clinical and histological parameters in Cox proportional hazards analysis.** The number of events was the number of kidney biopsies that preceded graft failure, for each biopsy separately. The number of events indicated in this table therefore does not take into account the fact that multiple biopsies could be performed in one kidney transplant. Hazard ratios and *P* values were calculated using the counting process model in order to account for repeat biopsies within the same patient.

| Parameter                                       | COHORT 1 (N=1335 Biopsies) |                  |                       |                | COHORT 2 (N=919 Biopsies) |                  |                       |                |
|-------------------------------------------------|----------------------------|------------------|-----------------------|----------------|---------------------------|------------------|-----------------------|----------------|
|                                                 | Number of biopsies         | Number of events | Hazard ratio (95% CI) | <i>P</i> value | Number of biopsies        | Number of events | Hazard ratio (95% CI) | <i>P</i> value |
| <b>Donor age</b>                                |                            |                  |                       |                |                           |                  |                       |                |
| <40 years                                       | 589                        | 216              | 1                     |                | 281                       | 35               | 1                     |                |
| 40-60 years                                     | 571                        | 236              | 1.24 (0.93-1.65)      | 0.14           | 453                       | 58               | 0.57 (0.27-1.21)      | 0.14           |
| >60 years                                       | 175                        | 97               | 1.62 (1.10-2.37)      | 0.01           | 185                       | 46               | 1.91 (0.90-4.07)      | 0.09           |
| <b>Recipient age</b>                            |                            |                  |                       |                |                           |                  |                       |                |
| <40 years                                       | 421                        | 204              | 1                     |                | 160                       | 33               | 1                     |                |
| 40-60 years                                     | 660                        | 256              | 0.97 (0.73-1.31)      | 0.86           | 380                       | 57               | 0.95 (0.40-2.30)      | 0.92           |
| >60 years                                       | 254                        | 89               | 1.13 (0.77-1.65)      | 0.53           | 379                       | 49               | 1.18 (0.48-2.88)      | 0.72           |
| <b>Indication vs. protocol biopsy</b>           |                            |                  |                       |                |                           |                  |                       |                |
| Protocol biopsy                                 | --                         | --               | --                    |                | 719                       | 73               | 1                     |                |
| Indication biopsy                               | --                         | --               | --                    | --             | 200                       | 66               | 8.69 (4.18-18.0)      | <0.001         |
| <b>eGFR at time of biopsy</b>                   |                            |                  |                       |                |                           |                  |                       |                |
| >45 mL/min/m <sup>2</sup>                       | 71                         | 12               | 1                     |                | 488                       | 36               | 1                     |                |
| 30-45 mL/min/m <sup>2</sup>                     | 244                        | 72               | 1.90 (0.65-5.54)      | 0.24           | 244                       | 26               | 1.60 (0.67-3.80)      | 0.29           |
| 15-30 mL/min/m <sup>2</sup>                     | 572                        | 242              | 4.05 (1.49-11.0)      | 0.006          | 117                       | 37               | 6.92 (2.70-17.7)      | <0.001         |
| <15 mL/min/m <sup>2</sup>                       | 439                        | 219              | 6.71 (2.46-18.3)      | <.001          | 75                        | 40               | 27.4 (11.1-67.3)      | <0.001         |
| <b>Proteinuria at time of biopsy</b>            |                            |                  |                       |                |                           |                  |                       |                |
| <0.3 g/24h                                      | 665                        | 228              | 1                     |                | 750                       | 87               | 1                     |                |
| 0.3-1.0 g/24h                                   | 401                        | 178              | 1.32 (0.95-1.84)      | 0.10           | 131                       | 37               | 3.13 (1.44-6.78)      | 0.004          |
| 1.0-3.0 g/24h                                   | 217                        | 110              | 2.42 (1.73-3.39)      | <.001          | 32                        | 12               | 6.69 (2.22-201)       | <0.001         |
| >3.0 g/24h                                      | 52                         | 33               | 3.20 (1.96-5.22)      | <.001          | 6                         | 3                | 33.7 (7.23-157)       | <0.001         |
| <b>Mean arterial pressure at time of biopsy</b> |                            |                  |                       |                |                           |                  |                       |                |
| <median*                                        | 587                        | 212              | 1                     |                | 370                       | 57               | 1                     |                |
| >median*                                        | 587                        | 280              | 1.59 (1.18-2.14)      | 0.003          | 369                       | 64               | 1.50 (0.72-3.10)      | 0.28           |
| <b>Use of ACE-inhibitor or ARB</b>              |                            |                  |                       |                |                           |                  |                       |                |
| No                                              | 902                        | 371              | 1                     |                | 543                       | 94               | 1                     |                |
| Yes                                             | 278                        | 125              | 1.23 (0.90-1.68)      | 0.20           | 376                       | 45               | 0.62 (0.32-1.18)      | 0.14           |

Supplemental Table 2 (continued)

| Parameter                                        | COHORT 1 (N=1335 Biopsies) |                  |                       |         | COHORT 2 (N=919 Biopsies) |                  |                       |         |
|--------------------------------------------------|----------------------------|------------------|-----------------------|---------|---------------------------|------------------|-----------------------|---------|
|                                                  | Number of biopsies         | Number of events | Hazard ratio (95% CI) | P value | Number of biopsies        | Number of events | Hazard ratio (95% CI) | P value |
| <b>DSA at time of biopsy</b>                     |                            |                  |                       |         |                           |                  |                       |         |
| No                                               | --                         | --               | --                    |         | 853                       | 124              | 1                     |         |
| Yes                                              | --                         | --               | --                    | --      | 66                        | 15               | 2.12 (0.93-4.87)      | 0.08    |
| <b>Tubulitis</b>                                 |                            |                  |                       |         |                           |                  |                       |         |
| Banff grade 0                                    | 676                        | 258              | 1                     |         | 673                       | 92               | 1                     |         |
| Banff grade 1                                    | 368                        | 161              | 0.94 (0.69-1.29)      | 0.70    | 154                       | 24               | 1.15 (0.27-4.88)      | 0.85    |
| Banff grade 2-3                                  | 291                        | 130              | 0.79 (0.55-1.14)      | 0.21    | 92                        | 23               | 2.51 (1.11-5.69)      | 0.03    |
| <b>Interstitial inflammation</b>                 |                            |                  |                       |         |                           |                  |                       |         |
| Banff grade 0                                    | 639                        | 234              | 1                     |         | 727                       | 96               | 1                     |         |
| Banff grade 1                                    | 202                        | 91               | 0.98 (0.67-1.42)      | 0.91    | 88                        | 13               | 1.71 (0.59-4.97)      | 0.32    |
| Banff grade 2-3                                  | 494                        | 224              | 0.89 (0.66-1.20)      | 0.44    | 104                       | 30               | 3.07 (1.15-8.18)      | 0.02    |
| <b>Intimal arteritis</b>                         |                            |                  |                       |         |                           |                  |                       |         |
| Absent                                           | 1009                       | 398              | 1                     |         | 828                       | 117              | 1                     |         |
| Present                                          | 317                        | 146              | 1.03 (0.75-1.42)      | 0.85    | 90                        | 22               | 4.33 (1.67-11.2)      | 0.003   |
| <b>Glomerulitis</b>                              |                            |                  |                       |         |                           |                  |                       |         |
| Banff grade 0-1                                  | 1106                       | 435              | 1                     |         | 851                       | 121              | 1                     |         |
| Banff grade 2-3                                  | 225                        | 111              | 1.61 (1.16-2.25)      | 0.005   | 68                        | 18               | 2.25 (0.87-5.79)      | 0.09    |
| <b>Peritubular capillaritis</b>                  |                            |                  |                       |         |                           |                  |                       |         |
| Absent                                           | 1107                       | 434              | 1                     |         | 784                       | 105              |                       |         |
| Present                                          | 215                        | 106              | 1.43 (1.03-2.01)      | 0.04    | 135                       | 34               | 2.33 (1.10-4.94)      | 0.03    |
| <b>Microcirculation inflammation</b>             |                            |                  |                       |         |                           |                  |                       |         |
| g+ptc 0-1                                        | 1060                       | 416              | 1                     |         | 810                       | 112              | 1                     |         |
| g+ptc ≥2                                         | 275                        | 133              | 1.51 (1.10-2.06)      | 0.01    | 109                       | 27               | 2.70 (1.27-5.74)      | 0.01    |
| <b>C4d deposition in peritubular capillaries</b> |                            |                  |                       |         |                           |                  |                       |         |
| Grade 0-1                                        | 917                        | 371              | 1                     |         | 832                       | 110              | 1                     |         |
| Grade 2-3                                        | 342                        | 140              | 0.83 (0.60-1.16)      | 0.28    | 78                        | 28               | 3.52 (1.56-7.93)      | 0.002   |
| <b>IF/TA grade</b>                               |                            |                  |                       |         |                           |                  |                       |         |
| Banff grade 0                                    | 794                        | 279              | 1                     |         | 526                       | 60               | 1                     |         |
| Banff grade 1                                    | 371                        | 166              | 1.51 (1.09-2.08)      | 0.01    | 297                       | 48               | 0.97 (0.45-2.11)      | 0.94    |
| Banff grade 2-3                                  | 170                        | 104              | 3.42 (2.44-4.81)      | <0.001  | 95                        | 31               | 2.76 (1.27-5.99)      | 0.01    |

Supplemental Table 2 (continued)

| Parameter                                   | COHORT 1 (N=1335 Biopsies) |                  |                          |         | COHORT 2 (N=919 Biopsies) |                  |                          |         |
|---------------------------------------------|----------------------------|------------------|--------------------------|---------|---------------------------|------------------|--------------------------|---------|
|                                             | Number of biopsies         | Number of events | Hazard ratio<br>(95% CI) | P value | Number of biopsies        | Number of events | Hazard ratio<br>(95% CI) | P value |
| <b>Transplant glomerulopathy</b>            |                            |                  |                          |         |                           |                  |                          |         |
| Banff grade 0                               | 1230                       | 491              | 1                        |         | 902                       | 133              | 1                        |         |
| Banff grade 1                               | 46                         | 22               | 1.72 (1.00-2.98)         | 0.05    | 11                        | 4                | 3.84 (1.07-13.8)         | 0.04    |
| Banff grade 2-3                             | 55                         | 33               | 3.24 (2.10-5.00)         | <0.001  | 6                         | 2                | 8.14 (1.87-35.5)         | 0.005   |
| <b>Arteriolar hyalinosis</b>                |                            |                  |                          |         |                           |                  |                          |         |
| Banff grade 0                               | 667                        | 257              | 1                        |         | 645                       | 82               | 1                        |         |
| Banff grade 1                               | 360                        | 150              | 0.92 (0.67-1.27)         | 0.63    | 193                       | 37               | 1.09 (0.50-2.35)         | 0.83    |
| Banff grade 2-3                             | 307                        | 141              | 1.04 (0.75-1.44)         | 0.81    | 81                        | 20               | 1.59 (0.54-4.66)         | 0.40    |
| <b>Vascular intimal thickening</b>          |                            |                  |                          |         |                           |                  |                          |         |
| Banff grade 0                               | 1008                       | 386              | 1                        |         | 513                       | 69               | 1                        |         |
| Banff grade 1                               | 185                        | 87               | 1.42 (0.99-2.03)         | 0.05    | 248                       | 37               | 0.88 (0.42-1.87)         | 0.75    |
| Banff grade 2-3                             | 133                        | 72               | 2.33 (1.65-3.28)         | <0.001  | 157                       | 33               | 1.49 (0.69-3.20)         | 0.31    |
| <b>Mesangial matrix increase</b>            |                            |                  |                          |         |                           |                  |                          |         |
| Banff grade 0                               | 1044                       | 402              | 1                        |         | 838                       | 123              | 1                        |         |
| Banff grade 1                               | 107                        | 49               | 1.31 (0.85-2.02)         | 0.23    | 50                        | 5                | 1.30 (0.39-4.30)         | 0.67    |
| Banff grade 2                               | 182                        | 97               | 1.88 (1.37-2.58)         | <0.001  | 31                        | 11               | 2.97 (1.03-8.52)         | 0.04    |
| <b>Glomerulosclerosis</b>                   |                            |                  |                          |         |                           |                  |                          |         |
| Banff grade 0                               | 781                        | 302              | 1                        |         | 536                       | 70               | 1                        |         |
| Banff grade 1                               | 358                        | 156              | 1.27 (0.92-1.75)         | 0.15    | 346                       | 51               | 1.58 (0.81-3.08)         | 0.18    |
| Banff grade 2-3                             | 191                        | 88               | 2.31 (1.67-3.19)         | <0.001  | 35                        | 18               | 3.98 (1.31-12.1)         | 0.02    |
| <b>Polyomavirus associated nephropathy</b>  |                            |                  |                          |         |                           |                  |                          |         |
| Absent                                      | 1312                       | 529              | 1                        |         | 908                       | 135              | 1                        |         |
| Present                                     | 23                         | 20               | 4.22 (2.44-7.30)         | <0.001  | 11                        | 4                | 5.96 (0.74-48.0)         | 0.09    |
| <b>De novo/recurrent glomerular disease</b> |                            |                  |                          |         |                           |                  |                          |         |
| Absent                                      | 1251                       | 506              | 1                        |         | 895                       | 128              | 1                        |         |
| Present                                     | 84                         | 43               | 1.71 (1.11-2.64)         | 0.02    | 24                        | 11               | 3.61 (1.24-10.5)         | 0.02    |

\*Median mean arterial pressure was 103 mm Hg in Cohort 1 and 96 mm Hg in Cohort 2.



**Supplemental Table 3. Hazard ratio (multivariate models) for graft failure, according to renal allograft histology, renal function and proteinuria at time of biopsy, adjusted for donor age and time after transplantation in Cox proportional hazards analysis (Cohort 2; N=919 biopsies).**

|                                           | <b>Parameter</b>                    | <b>Adjusted Hazard Ratio (95% CI)</b> | <b>P value</b> |
|-------------------------------------------|-------------------------------------|---------------------------------------|----------------|
| <b><u>MODEL 1 WITHOUT PROTEINURIA</u></b> |                                     |                                       |                |
| <b>eGFR at time of biopsy</b>             | 30-45 vs. >45 mL/min/m <sup>2</sup> | 1.18 (0.44-3.15)                      | 0.74           |
|                                           | 15-30 vs. >45 mL/min/m <sup>2</sup> | 6.26 (2.22-17.7)                      | <0.001         |
|                                           | <15 vs. >45 mL/min/m <sup>2</sup>   | 21.3 (6.51-69.6)                      | <0.001         |
| <b>IF/TA grade</b>                        | Banff grade 1 vs. 0                 | 0.80 (0.34-1.89)                      | 0.61           |
|                                           | Banff grade 2-3 vs. 0               | 2.42 (0.96-6.24)                      | 0.07           |
| <b>Transplant glomerulopathy</b>          | Present vs. absent                  | 10.2 (3.01-34.9)                      | <0.001         |
| <b><u>MODEL 2 WITH PROTEINURIA</u></b>    |                                     |                                       |                |
| <b>Proteinuria at time of biopsy</b>      | 0.3-1.0 vs. <0.3 g/24h              | 1.28 (0.52-3.18)                      | 0.59           |
|                                           | 1.0-3.0 vs. <0.3 g/24h              | 1.13 (0.28-4.58)                      | 0.87           |
|                                           | >3.0 vs. <0.3 g/24h                 | 14.9 (2.82-79.2)                      | 0.002          |
| <b>eGFR at time of biopsy</b>             | 30-45 vs. >45 mL/min/m <sup>2</sup> | 1.65 (0.65-4.23)                      | 0.30           |
|                                           | 15-30 vs. >45 mL/min/m <sup>2</sup> | 7.29 (2.60-20.4)                      | <0.001         |
|                                           | <15 vs. >45 mL/min/m <sup>2</sup>   | 22.6 (5.78-88.1)                      | <0.001         |

**Supplemental Table 4. Univariate analysis of the determinants of 24h proteinuria in Cohort 1 (N=1335 indication biopsies) and in Cohort 2 (N= 919 indication and protocol biopsies).**

| Parameter                                             | Cohort 1 (N=1335) |                |         |         | Cohort 2 (N=919) |                |         |         |
|-------------------------------------------------------|-------------------|----------------|---------|---------|------------------|----------------|---------|---------|
|                                                       | Estimate          | Standard Error | t value | P value | Estimate         | Standard Error | t value | P value |
| <b>Donor age</b>                                      |                   |                |         |         |                  |                |         |         |
| 40-60 years vs. <40 years                             | -0.20             | 0.08           | -2.61   | 0.01    | 0.02             | 0.04           | 0.51    | 0.61    |
| >60 years vs. <40 years                               | -0.29             | 0.11           | -2.60   | 0.01    | 0.03             | 0.05           | 0.63    | 0.53    |
| <b>Donor gender</b>                                   |                   |                |         |         |                  |                |         |         |
| Female vs. male                                       | 0.07              | 0.07           | 1.00    | 0.32    | 0.06             | 0.04           | 1.54    | 0.12    |
| <b>Recipient age</b>                                  |                   |                |         |         |                  |                |         |         |
| 40-60 years vs. <40 years                             | 0.06              | 0.08           | 0.68    | 0.50    | 0.01             | 0.05           | 0.10    | 0.92    |
| >60 years vs. <40 years                               | -0.21             | 0.10           | -2.06   | 0.04    | -0.07            | 0.05           | -1.36   | 0.17    |
| <b>Recipient gender</b>                               |                   |                |         |         |                  |                |         |         |
| Female vs. male                                       | -0.11             | 0.07           | -1.51   | 0.13    | -0.08            | 0.04           | -2.00   | 0.05    |
| <b>Repeat transplantation</b>                         |                   |                |         |         |                  |                |         |         |
| Yes vs. no                                            | 0.48              | 0.10           | 4.78    | <0.001  | 0.10             | 0.05           | 1.91    | 0.06    |
| <b>Donor-specific antibodies</b>                      |                   |                |         |         |                  |                |         |         |
| Present at time of biopsy vs. absent                  | --                | --             | --      | --      | -0.03            | 0.07           | 0.38    | 0.70    |
| <b>Mean arterial pressure (MAP) at time of biopsy</b> |                   |                |         |         |                  |                |         |         |
| >median vs. <median*                                  | 0.24              | 0.06           | 3.75    | <0.001  | 0.11             | 0.04           | 2.86    | 0.005   |
| <b>Use of ACE-inhibitor or ARB</b>                    |                   |                |         |         |                  |                |         |         |
| Yes vs. no                                            | 0.19              | 0.08           | 2.39    | 0.02    | -0.04            | 0.04           | 1.18    | 0.24    |
| <b>Use of an mTOR inhibitor</b>                       |                   |                |         |         |                  |                |         |         |
| Yes vs. no                                            | --                | --             | --      | --      | 0.00             | 0.10           | 0.04    | 0.97    |
| <b>Tubulitis</b>                                      |                   |                |         |         |                  |                |         |         |
| Banff grade 1 vs. 0                                   | 0.04              | 0.07           | 0.55    | 0.58    | 0.20             | 0.04           | 4.67    | <0.001  |
| Banff grade 2-3 vs. 0                                 | 0.00              | 0.08           | 0.01    | 0.99    | 0.14             | 0.05           | 2.65    | 0.008   |
| <b>Interstitial inflammation</b>                      |                   |                |         |         |                  |                |         |         |
| Banff grade 1 vs. 0                                   | 0.12              | 0.09           | 1.31    | 0.19    | 0.19             | 0.05           | 3.52    | 0.005   |
| Banff grade 2-3 vs. 0                                 | 0.10              | 0.07           | 1.44    | 0.15    | 0.27             | 0.05           | 5.41    | <0.001  |
| <b>Intimal arteritis</b>                              |                   |                |         |         |                  |                |         |         |
| Present vs. absent                                    | 0.07              | 0.07           | 0.97    | 0.33    | 0.25             | 0.05           | 4.97    | <0.001  |

Supplemental Table 4 (continued)

| Parameter                                        | Cohort 1 (N=1335) |                |         |         | Cohort 2 (N=919) |                |         |         |
|--------------------------------------------------|-------------------|----------------|---------|---------|------------------|----------------|---------|---------|
|                                                  | Estimate          | Standard Error | t value | P value | Estimate         | Standard Error | t value | P value |
| <b>Glomerulitis</b>                              |                   |                |         |         |                  |                |         |         |
| Banff grade 1 vs. 0                              | 0.13              | 0.09           | 1.47    | 0.14    | 0.13             | 0.07           | 1.99    | 0.05    |
| Banff grade 2-3 vs. 0                            | 0.19              | 0.08           | 2.32    | 0.02    | 0.28             | 0.06           | 4.38    | <0.001  |
| <b>Peritubular capillaritis</b>                  |                   |                |         |         |                  |                |         |         |
| Banff grade 1 vs. 0                              | 0.15              | 0.09           | 1.70    | 0.09    | 0.14             | 0.05           | 2.59    | 0.01    |
| Banff grade 2-3 vs. 0                            | 0.66              | 0.20           | 3.36    | 0.0009  | 0.30             | 0.08           | 3.94    | 0.0001  |
| <b>Microcirculation inflammation</b>             |                   |                |         |         |                  |                |         |         |
| g+ptc $\geq$ 2 vs. 0-1                           | 0.20              | 0.08           | 2.59    | 0.01    | 0.25             | 0.05           | 4.94    | <0.001  |
| <b>C4d deposition in peritubular capillaries</b> |                   |                |         |         |                  |                |         |         |
| Grade 2-3 vs. 0-1                                | 0.10              | 0.07           | 1.39    | 0.17    | 0.24             | 0.06           | -4.21   | <0.001  |
| <b>IF/TA grade</b>                               |                   |                |         |         |                  |                |         |         |
| Banff grade 1 vs. 0                              | 0.11              | 0.07           | 1.49    | 0.14    | -0.05            | 0.38           | -1.31   | 0.19    |
| Banff grade 2-3 vs. 0                            | 0.29              | 0.10           | 2.87    | 0.005   | -0.03            | 0.06           | -0.52   | 0.60    |
| <b>Transplant glomerulopathy</b>                 |                   |                |         |         |                  |                |         |         |
| Present vs. absent                               | 1.15              | 0.13           | 8.71    | <0.001  | 0.92             | 0.12           | 7.79    | <0.001  |
| <b>Arteriolar hyalinosis</b>                     |                   |                |         |         |                  |                |         |         |
| Banff grade 1 vs. 0                              | 0.14              | 0.07           | 1.93    | 0.05    | 0.01             | 0.04           | 0.31    | 0.75    |
| Banff grade 2-3 vs. 0                            | 0.01              | 0.08           | 0.09    | 0.93    | 0.06             | 0.06           | 0.98    | 0.33    |
| <b>Vascular intimal thickening</b>               |                   |                |         |         |                  |                |         |         |
| Banff grade 1 vs. 0                              | 0.02              | 0.09           | 0.19    | 0.85    | 0.02             | 0.04           | 0.42    | 0.67    |
| Banff grade 2-3 vs. 0                            | 0.43              | 0.11           | 3.89    | <0.001  | -0.06            | 0.05           | -1.26   | 0.21    |
| <b>Mesangial matrix increase</b>                 |                   |                |         |         |                  |                |         |         |
| Banff grade 1 vs. 0                              | -0.21             | 0.11           | -1.895  | 0.07    | 0.03             | 0.08           | 0.44    | 0.66    |
| Banff grade 2-3 vs. 0                            | 0.11              | 0.14           | 0.77    | 0.44    | 0.30             | 0.09           | 3.18    | 0.002   |
| <b>Glomerulosclerosis</b>                        |                   |                |         |         |                  |                |         |         |
| Banff grade 1 vs. 0                              | -0.03             | 0.07           | -0.41   | 0.68    | -0.01            | 0.03           | -0.25   | 0.80    |
| Banff grade 2-3 vs. 0                            | 0.21              | 0.10           | 2.00    | 0.046   | 0.06             | 0.08           | 0.71    | 0.48    |
| <b>De novo/recurrent glomerular disease*</b>     |                   |                |         |         |                  |                |         |         |
| Present vs. absent                               | 1.09              | 0.14           | 7.65    | <0.001  | 0.52             | 0.11           | 4.73    | <0.001  |

\* Median MAP was 103 mm Hg (range 59-149) in Cohort 1, and 96 mm Hg (range 71-114) in Cohort 2 ( $P<0.001$ ).

**Supplemental Table 5. Association between proteinuria and concomitant renal graft histology after transplantation according to time after transplantation in Cohort 1 (N=1335 indication biopsies).**

|                                                                                                             | <b>&lt; 0.3 g/24h</b> | <b>0.3-1 g/24h</b> | <b>1-3 g/24h</b> | <b>&gt; 3 g/24</b> | <b>P value</b> |
|-------------------------------------------------------------------------------------------------------------|-----------------------|--------------------|------------------|--------------------|----------------|
| <b><u>&lt;3 Months Post-Transplant</u></b>                                                                  |                       |                    |                  |                    |                |
| <b>N</b>                                                                                                    | 360                   | 269                | 108              | 15                 |                |
| <b>Any glomerular abnormality*</b>                                                                          | 48% (174/360)         | 57% (154/269)      | 48% (52/108)     | 60% (9/15)         | 0.31           |
| <b>Glomerulitis grade &gt; 0</b>                                                                            | 36% (129/360)         | 45% (120/269)      | 37% (39/107)     | 33% (5/15)         | 0.50           |
| <b>Peritubular capillaritis grade &gt; 0</b>                                                                | 18% (66/357)          | 22% (60/267)       | 26% (27/105)     | 33% (5/15)         | 0.04           |
| <b>Transplant glomerulopathy grade &gt; 0</b>                                                               | 0.3% (1/360)          | 0.0% (0/269)       | 0.0% (0/107)     | 0.0% (0/15)        | 0.37           |
| <b>Mesangial matrix increase &gt; 0</b>                                                                     | 13% (48/360)          | 12% (33/269)       | 19% (20/108)     | 0.0% (0/15)        | 0.80           |
| <b>C4d deposition in peritubular capillaries grade &gt;1</b>                                                | 38% (128/338)         | 33% (83/251)       | 44% (45/102)     | 53% (8/15)         | 0.32           |
| <b>Global glomerulosclerosis &gt;25%</b>                                                                    | 4.2% (15/360)         | 5.2% (14/268)      | 1.9% (2/107)     | 13% (2/15)         | 0.18           |
| <b>De novo or recurrent glomerular disease</b>                                                              | 1.4% (5/360)          | 1.5% (4/269)       | 2.8% (3/108)     | 20% (3/15)         | 0.005          |
| <b>IF/TA grade &gt; 1</b>                                                                                   | 0.6% (2/360)          | 2.6% (7/269)       | 2.8% (3/108)     | 0.0% (0/15)        | 0.09           |
| <b>Transplant glomerulopathy, microcirculation inflammation and/or de novo/recurrent glomerular disease</b> | 26% (92/360)          | 33% (89/269)       | 33% (36/108)     | 40% (6/15)         | 0.12           |
| <b><u>&gt; 3 Months Post-Transplant</u></b>                                                                 |                       |                    |                  |                    |                |
| <b>N</b>                                                                                                    | 305                   | 132                | 109              | 37                 |                |
| <b>Any glomerular abnormality*</b>                                                                          | 53% (160/305)         | 69% (91/132)       | 78% (85/109)     | 92% (34/37)        | <0.001         |
| <b>Glomerulitis grade &gt; 0</b>                                                                            | 15% (45/305)          | 29% (37/130)       | 31% (33/108)     | 49% (18/37)        | <0.001         |
| <b>Peritubular capillaritis grade &gt; 0</b>                                                                | 7.3% (22/303)         | 12% (15/130)       | 12% (13/108)     | 19% (7/37)         | 0.01           |
| <b>Transplant glomerulopathy grade &gt; 0</b>                                                               | 4.3% (13/305)         | 22% (28/130)       | 39% (42/108)     | 46% (17/37)        | <0.001         |
| <b>Mesangial matrix increase &gt; 0</b>                                                                     | 25% (76/305)          | 33% (43/131)       | 44% (48/108)     | 57% (21/37)        | <0.001         |
| <b>C4d deposition in peritubular capillaries grade &gt;1</b>                                                | 11% (32/292)          | 16% (19/122)       | 19% (20/103)     | 19% (7/36)         | 0.02           |
| <b>Global glomerulosclerosis &gt; 25%</b>                                                                   | 21% (64/304)          | 31% (40/138)       | 39% (42/109)     | 32% (12/37)        | 0.003          |
| <b>De novo or recurrent glomerular disease</b>                                                              | 5.5% (20/305)         | 9.9% (13/132)      | 22% (24/109)     | 32% (12/37)        | <0.001         |
| <b>IF/TA grade &gt; 1</b>                                                                                   | 19% (59/305)          | 32% (42/132)       | 40% (44/109)     | 35% (13/37)        | <0.001         |
| <b>Transplant glomerulopathy, microcirculation inflammation and/or de novo/recurrent glomerular disease</b> | 16% (50/305)          | 33% (43/132)       | 52% (57/109)     | 76% (28/37)        | <0.001         |

\*Any glomerular abnormality was defined as glomerulitis>0, global glomerulosclerosis >25%, mesangial matrix score >0, transplant glomerulopathy and/or de novo/recurrent glomerular disease.
